# Supplementary material for: The Cationic Amphiphilic Drug Hexamethylene Amiloride Eradicates Bulk Breast Cancer Cells and Therapy-Resistant Subpopulations With Similar Efficiencies
Source: Preprints.org preprint supplement (doi:10.20944/preprints202201.0082.v1), 2022-01-06
Supplement: Supplementary file 1 [file supplementary]

## Supplementary Tables and Figures

| Cell Line    | Subtype           | ER  | PR  | ERBB2/<br>HER2 | Tissue Type               | Source               |
|--------------|-------------------|-----|-----|----------------|---------------------------|----------------------|
| <i>Human</i> |                   |     |     |                |                           |                      |
| MDA-MB-231   | Basal             | -   | -   | -              | Metastatic Adenocarcinoma | ATCC #HTB-26         |
| MCF7         | Luminal           | +   | +   | -              | Metastatic Adenocarcinoma | ATCC #HTB-22         |
| SKBR3        | Luminal           | -   | -   | +              | Adenocarcinoma            | ATCC #HTB-30         |
| T47D         | Luminal           | +   | +   | -              | Invasive Ductal Carcinoma | ATCC #HTB-133        |
| MCF10A       | Basal             | -   | -   | -              | Non-tumorigenic           | ATCC #CRL-10317      |
| HMEC4        | Luminal           | unk | unk | unk            | Non-tumorigenic           | Gifted by K.Rao      |
| <i>Mouse</i> |                   |     |     |                |                           |                      |
| NDL          | Luminal           | -   | -   | +              | Invasive Ductal Carcinoma | Primary tumors       |
| Met-1        | Luminal           | -   | unk | unk            | Metastatic Adenocarcinoma | Gifted by A.Borowsky |
| 4T1          | Luminal and Basal | -   | -   | -              | Metastatic Adenocarcinoma | ATCC #CRL-2539       |
| nMuMG        | Luminal           | -   | -   | unk            | Nontumorigenic            | ATCC #CRL-1636       |

**Supplementary Table S1. Characteristics of breast cancer cell lines.** Breast and mammary cell lines were previously derived from both tumor and non-tumorigenic tissue types and classified based on cell of origin (basal or luminal) as well as hormone receptor expression status (estrogen receptor [ER], progesterone receptor [PR], and epidermal growth factor receptor 2/human epidermal growth factor receptor 2 [ERBB2/HER2]). Receptor expression is denoted as positive (+), negative (-), or unknown (unk). Cell lines were either purchased from American Type Culture Collection (ATCC) or gifted.

---

| Cell Line | Tissue Type                           | Source         |
|-----------|---------------------------------------|----------------|
| A549      | Lung Adenocarcinoma                   | ATCC #CCL-185  |
| Du145     | Prostate Carcinoma                    | ATCC #HTB-81   |
| HepG2     | Hepatocellular Carcinoma              | ATCC #HB-8065  |
| J82       | Transitional Cell Carcinoma (Bladder) | ATCC #HTB-1    |
| LS174T    | Colon Adenocarcinoma                  | ATCC #CL-188   |
| Panc-1    | Pancreatic Ductal Cell Carcinoma      | ATCC #CRL-1469 |
| T98G      | Glioblastoma                          | ATCC #CRL-1690 |

---

**Supplementary Table S2. Characteristics of non-mammary cancer cell lines. (A)** Human tumor-derived cell lines representing an array of non-mammary origin cancers are listed with descriptions of tissue origin and source. All cell lines were purchased from ATCC, and catalog numbers are included.

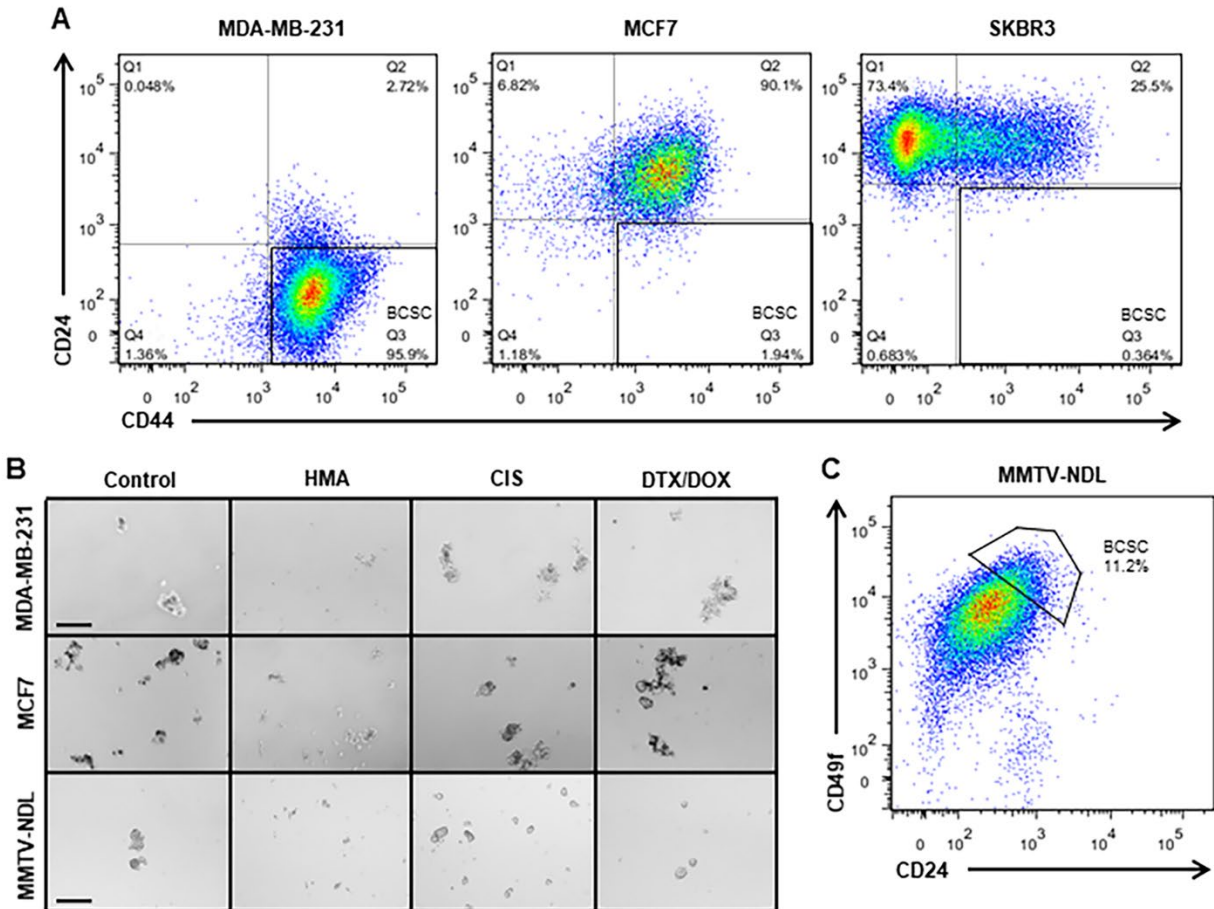

**Supplementary Figure S1. The BCSC subpopulation is susceptible to HMA-induced death.** (A) FACS dot plot showing cell surface markers used to isolate human BCSCs ( $CD44^+/CD24^{low}$ , Q3). (B) Representative images of 7-day spheres grown from  $CD44^+/CD24^-$  BCSC-enriched human breast cancer cells (MDA-MB-231 and MCF7) and mouse mammary tumor cells (MMTV-NDL) following treatment with  $40\mu\text{M}$  HMA,  $40\mu\text{M}$  cisplatin (CIS), or a combination of apoptosis inducing agents ( $170\text{nM}$  doxorubicin (DOX) and  $50\text{nM}$  docetaxel (DTX)). Scale bar =  $200\mu\text{m}$ . (C) FACS dot plot showing cell surface markers used to isolate mouse primary tumor-derived BCSCs ( $CD24^{high}/CD49f^{high}/Lin^-$ ).

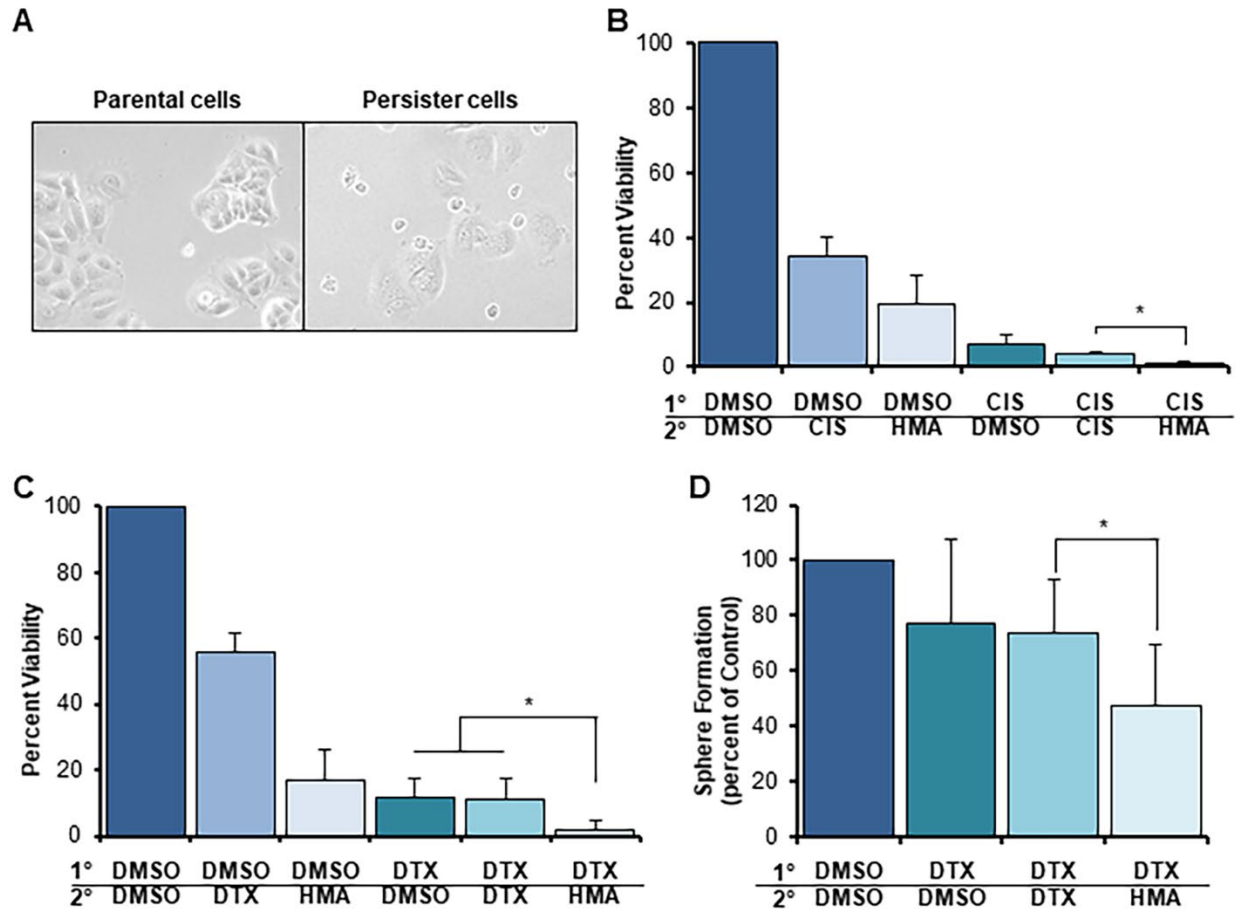

**Supplementary Figure S2. Chemoresistant cells are susceptible to HMA.** (A) Representative images of parental and persister MCF7 cells are displayed. (B) Met-1 mouse mammary cancer cells were exposed to vehicle only control (DMSO) or 100 $\mu$ M CIS for 48 hours (primary treatment [1°]) followed by a subsequent treatment of vehicle, 40 $\mu$ M HMA, or a second dose of CIS (100 $\mu$ M) for 24 hours (secondary treatment [2°]). Viability was determined by trypan blue exclusion assay. (C,D) Met-1 mouse mammary cells were administered 1° treatments of vehicle or 500nM DTX and 2° treatments of vehicle, 40 $\mu$ M HMA, or 500nM DTX as in (B), and cell viability was quantified (C). Equal numbers of post-treatment cells were plated in serum-free, low adherent conditions to enrich for the chemotherapy-insensitive BCSC population, and sphere count was determined after 7 days in culture (D). Data in (B-D) are presented as averages of six replicate experiments  $\pm$  SD and are compared to the vehicle only control (DMSO-DMSO).  $p < 0.05$  \*.

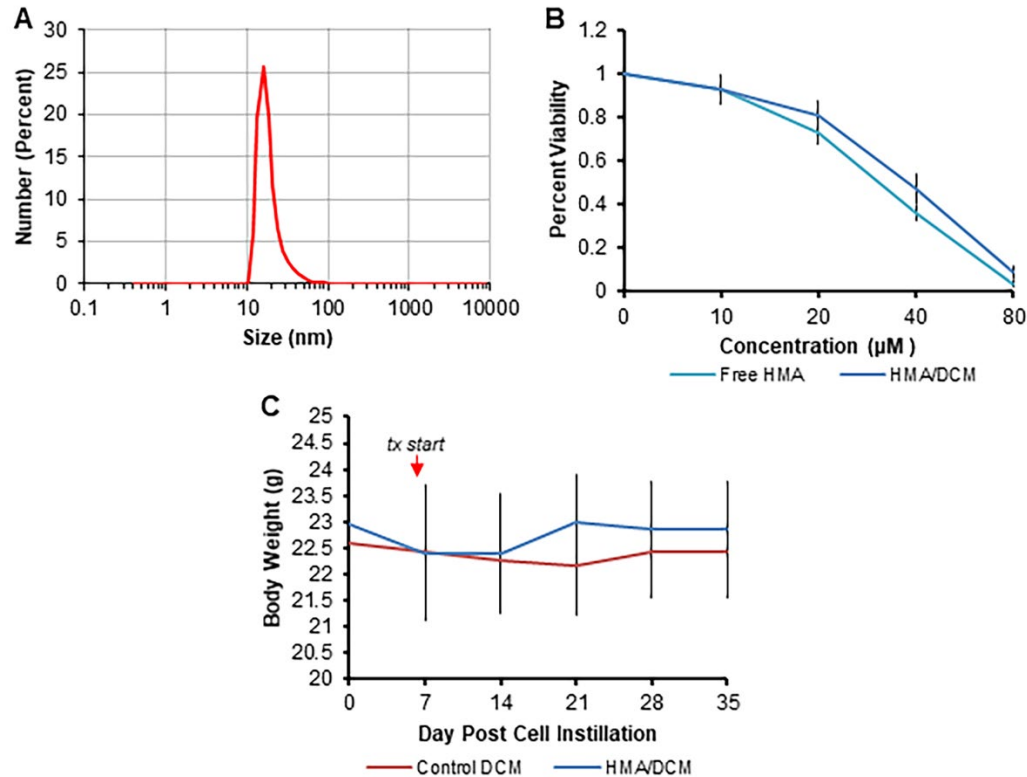

**Supplementary Figure S3. Preparation and characterization of HMA-loaded DCM nanoparticles.** DCMs were formed by oxidation of thiol groups to disulfide bond within the micelle core following self-assembly of a thiolated linear-dendritic polymer (telodendrimer) composed of polyethylene glycol (PEG) attached to a dendritic oligomer of cholic acids (CAs) through a poly(lysine (L)-cysteine (Cys)-Ebes) backbone ([PEG<sup>5k</sup>-Cys<sub>4</sub>-L<sub>8</sub>-CA<sub>8</sub>] indicating the length of PEG) [38]. Micelle crosslinking enhances structural stability *in vivo* and slows drug release for improved duration in systemic circulation, and DCMs demonstrate tumor site accumulation due to the enhanced permeability and retention effect [38]. **(A)** The size of HMA-loaded DCMs was measured by a dynamic light scattering (DLS) instrument (Microtrac). The final concentration of polymers was kept at 20mg/ml. HMA loading was 5mg/mL (loading rate was 89.5%). Size distribution of loaded DCMs is displayed (average particle size was 19.8nm). **(B)** ND1 tumor cells were treated for 24 hours with free HMA or DCM/HMA, and viability was assessed by MTT assay. Data is presented as the average of 3 biological replicate experiments  $\pm$  SEM. **(C)** Average body weight of FVB/NJ mice injected with ND1 cells via tail vein over the course of intravenous DCM/HMA treatment.

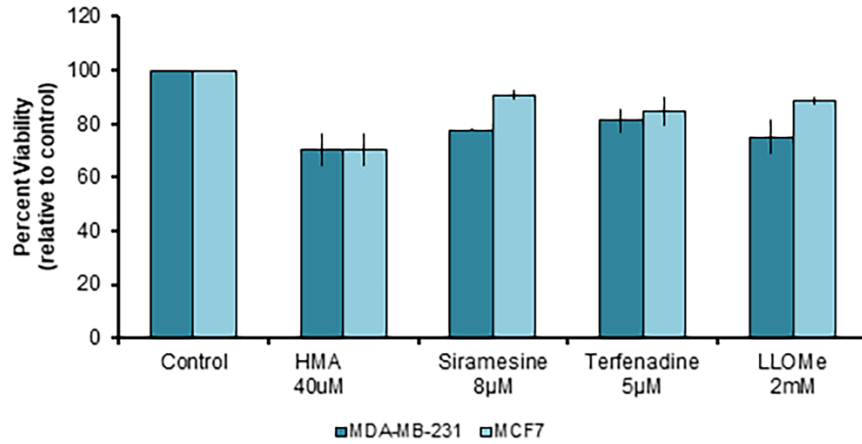

**Supplementary Figure S4. LMP onset precedes significant cell death.** MDA-MB-231 and MCF7 cells were treated with vehicle, 40 $\mu$ M HMA, 8 $\mu$ M siramesine, 5 $\mu$ M terfenadine, or 2mM LLOMe for 20 hours, and cytotoxicity was quantified by MTT assay. Error bars represent SEM.
